# Supplementary material for: Characterization and Full Genome Sequence of Novel KPP-5 Lytic Phage against Klebsiella pneumoniae Responsible for Recalcitrant Infection
Source: PubMed Central journal article supplement (PMC8066614; doi:10.3390/biomedicines9040342), 2021-03-28
Supplement: biomedicines-09-00342-s001.pdf [file biomedicines-09-00342-s001.pdf]

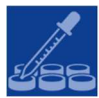

Supplementary

# Characterization and Full Genome Sequence of Novel KPP-5 Lytic Phage Against *Klebsiella Pneumoniae* Responsible for Recalcitrant Infection

Ahmed R. Sofy <sup>1,\*</sup>, Noha K. El-DougDoug <sup>2</sup>, Ehab E. Refaey <sup>1</sup>, Rehab A. Dawoud <sup>3,4</sup> and Ahmed A. Hmed <sup>1</sup>

<sup>1</sup> Botany and Microbiology Department, Faculty of Science, Al-Azhar University, Nasr City, Cairo 11884, Egypt; ehabrefaey@azhar.edu.eg (E.E.R.); ahmed\_hmed@azhar.edu.eg (A.A.H.)

<sup>2</sup> Botany and Microbiology Department, Faculty of Science, Benha University, Benha 13518, Egypt; nohaeldougDoug@gmail.com

<sup>3</sup> Virus and Phytoplasma Research Department, Plant Pathology Research Institute, Agricultural Research Center (ARC), Giza 12619, Egypt; rdawood@jazanu.edu.sa

<sup>4</sup> Department of Biology, Faculty of Science, Jazan University, Box 114, Jazan 45142, Saudi Arabia

\* Correspondence: ahmed\_sofy@azhar.edu.eg (A.R.S)

**Table S1.** Antibiotics resistance profiles of the *K. pneumoniae* host strain.

| Scientific Name | Disc Potency (mcg) | Trade Name   | Symbol | Antibiotic-resistance profiles |
|-----------------|--------------------|--------------|--------|--------------------------------|
| Ampicillin      | 10                 | Ampicillin   | Am     | I                              |
| Gentamicin      | 10                 | Gentamicin   | CN     | R                              |
| Ciprofloxacin   | 5                  | Tarivid      | CIP    | R                              |
| Ofloxacin       | 5                  | Tarivid      | OFX    | I                              |
| Oxacillin       | 1                  | Oxacillin    | OX     | S                              |
| Clindamycin     | 2                  | Augmentin    | DA     | R                              |
| Levofloxacin    | 5                  | Lee flox     | LEV    | I                              |
| Flucloxacillin  | 5                  | Keflin       | FL     | R                              |
| Rifamycin       | 30                 | Remactan     | RF     | R                              |
| Tobramycin      | 10                 | Nebcin       | TOB    | S                              |
| Norfloxacin     | 10                 | Noroxin      | NOR    | I                              |
| Gatifloxacin    | 5                  | Lincocin     | GAT    | S                              |
| Tetracycline    | 30                 | Tetracycline | TE     | I                              |
| Erythromycin    | 15                 | Erythromycin | E      | R                              |
| Aztreonam       | 1                  | Meronam      | ATM    | R                              |
| Vancomycin      | 30                 | Vancocin     | VA     | I                              |
| Cephadrine      | 30                 | Velocef      | CE     | S                              |

**Table S2.** Genome feature of phage KPP-5, gene products, and their predicted functions.

| Gene                      |           |        |       | Gene product      |                     |                        |                                        | BLASTp best match                     | E-value | Identities       | Accession    |
|---------------------------|-----------|--------|-------|-------------------|---------------------|------------------------|----------------------------------------|---------------------------------------|---------|------------------|--------------|
| Gene accession            | Location  | Strand | Frame | Protein size (aa) | Molecule mass (kDa) | Isoelectric Point (pI) | Predicted protein function             |                                       |         |                  |              |
| <i>gp1</i><br>(QSJ04721)  | 16-1062   | +      | 1     | 348               | 39.54               | 4.99                   | DNA ligase                             | <i>Klebsiella</i> phage vB_KpnP_Emp27 | 0       | 345/348 (99.14%) | QEG11869     |
| <i>gp2</i><br>(QSJ04722)  | 950-1126  | +      | 2     | 58                | 6.32                | 12.43                  | hypothetical protein                   | -                                     | -       | -                | -            |
| <i>gp3</i><br>(QSJ04723)  | 1232-1489 | +      | 2     | 85                | 9.90                | 11.58                  | hypothetical protein                   | <i>Enterobacter</i> phage E-3         | 6e-54   | 83/85 (97.65%)   | YP_009198329 |
| <i>gp4</i><br>(QSJ04724)  | 1489-1959 | +      | 1     | 156               | 17.67               | 9.65                   | DUF3310 domain-containing protein      | <i>Klebsiella</i> phage vB_KpnP_Emp27 | 1e-111  | 154/156 (98.72%) | QEG11871     |
| <i>gp5</i><br>(QSJ04725)  | 2080-2316 | +      | 1     | 78                | 8.85                | 4.56                   | Host RNA polymerase inhibitor, T7-like | <i>Enterobacter</i> phage E-3         | 8e-52   | 78/78 (100%)     | YP_009198326 |
| <i>gp6</i><br>(QSJ04726)  | 3066-3527 | +      | 3     | 153               | 17.57               | 10.15                  | endonuclease                           | <i>Enterobacter</i> phage E-3         | 3e-107  | 153/153 (100%)   | YP_009198324 |
| <i>gp7</i><br>(QSJ04727)  | 3520-3975 | +      | 1     | 151               | 16.88               | 9.23                   | endolysin                              | <i>Klebsiella</i> phage 31            | 2e-109  | 151/151 (100%)   | QGH73730     |
| <i>gp8</i><br>(QSJ04728)  | 4154-5854 | +      | 2     | 566               | 62.80               | 4.90                   | DNA primase/helicase                   | <i>Enterobacteria</i> phage T3        | 0       | 563/566 (99.47%) | NP_523315    |
| <i>gp9</i><br>(QSJ04729)  | 5574-5903 | +      | 3     | 109               | 11.93               | 7.18                   | hypothetical protein                   | <i>Citrobacter</i> phage SH1          | 5e-71   | 106/109 (97.25%) | YP_009286649 |
| <i>gp10</i><br>(QSJ04730) | 6176-6460 | +      | 2     | 94                | 10.75               | 10.60                  | hypothetical protein                   | <i>Klebsiella</i> phage 31            | 3e-63   | 94/94 (100%)     | QGH73734     |
| <i>gp11</i><br>(QSJ04731) | 6528-8642 | +      | 3     | 704               | 79.76               | 6.96                   | DNA polymerase                         | <i>Enterobacter</i> phage E-3         | 0       | 701/704 (99.57%) | YP_009198319 |
| <i>gp12</i><br>(QSJ04732) | 8662-8961 | +      | 1     | 99                | 11.17               | 8.48                   | HNS binding protein                    | <i>Enterobacter</i> phage E-3         | 3e-66   | 99/99 (100%)     | YP_009198318 |
| <i>gp13</i><br>(QSJ04733) | 8961-9170 | +      | 3     | 69                | 7.26                | 10.25                  | HNS binding protein                    | <i>Klebsiella</i> phage vB_KpnP_Emp27 | 2e-42   | 69/69 (100%)     | QEG11882     |
| <i>gp14</i><br>(QSJ04734) | 9167-9346 | +      | 2     | 59                | 6.70                | 3.96                   | host recBCD nuclease inhibitor         | <i>Enterobacter</i> phage E-3         | 3e-35   | 58/59 (98.31%)   | YP_009198316 |

|                           |             |   |   |      |        |       |                                 |                                          |        |                       |              |
|---------------------------|-------------|---|---|------|--------|-------|---------------------------------|------------------------------------------|--------|-----------------------|--------------|
| <i>gp15</i><br>(QSJ04735) | 9343-10254  | + | 1 | 303  | 34.77  | 4.75  | exonuclease                     | <i>Klebsiella</i> phage<br>Patroon       | 0      | 302/303 (99.67%)      | QBQ72894     |
| <i>gp16</i><br>(QSJ04736) | 10442-10687 | + | 2 | 81   | 9.37   | 6.24  | hypothetical protein            | <i>Yersinia</i> phage<br>phiYeO3-12      | 5e-53  | 81/81 (100%)          | NP_052103    |
| <i>gp17</i><br>(QSJ04739) | 10970-11290 | + | 2 | 106  | 11.0   | 10.58 | tail assembly protein           | <i>Klebsiella</i> phage<br>Patroon       | 2e-63  | 105/106 (99.06%)      | QBQ72898     |
| <i>gp18</i><br>(QSJ04737) | 11301-12908 | + | 3 | 535  | 58.64  | 4.27  | head-to-tail joining<br>protein | <i>Yersinia</i> phage<br>phiYeO3-12      | 0      | 535/535 (100%)        | NP_052106    |
| <i>gp19</i><br>(QSJ04738) | 13010-13942 | + | 2 | 310  | 33.72  | 4.02  | capsid assembly<br>protein      | <i>Salmonella</i> phage<br>phiSG-JL2     | 0      | 306/310 (99%)         | YP_001949781 |
| <i>gp20</i><br>(QSJ04740) | 14099-15142 | + | 2 | 347  | 36.92  | 6.73  | major capsid protein            | <i>Klebsiella</i> phage<br>NL_ZS_3       | 0      | 346/347 (99.71%)      | QNN97371     |
| <i>gp21</i><br>(QSJ04741) | 15181-15414 | + | 1 | 77   | 7.44   | 4.14  | major tail protein              | <i>Enterobacter</i> phage<br>E-3         | 4e-41  | 74/77 (96.10%)        | YP_009198343 |
| <i>gp22</i><br>(QSJ04742) | 15527-16117 | + | 2 | 196  | 22.23  | 4.21  | tail tubular protein A          | <i>Yersinia</i> phage<br>phiYeO3-12      | 1e-142 | 196/196 (100%)        | NP_052110    |
| <i>gp23</i><br>(QSJ04743) | 16133-18538 | + | 2 | 801  | 89.79  | 6.30  | tail tubular protein B          | <i>Citrobacter</i> phage<br>SH1          | 0      | 798/801 (99.50%)      | YP_009286665 |
| <i>gp24</i><br>(QSJ04744) | 18611-19021 | + | 2 | 136  | 15.80  | 5.67  | internal virion<br>protein A    | <i>Klebsiella</i> phage 31               | 7e-96  | 134/136 (98.53%)      | QGH73749     |
| <i>gp25</i><br>(QSJ04745) | 19024-19617 | + | 1 | 197  | 21.25  | 9.85  | internal virion<br>protein B    | <i>Yersinia</i> phage<br>phiYeO3-12      | 2e-139 | 197/197 (100%)        | NP_052114    |
| <i>gp26</i><br>(QSJ04746) | 19620-21863 | + | 3 | 747  | 85.08  | 5.32  | internal virion<br>protein C    | <i>Klebsiella</i> phage<br>NL_ZS_3       | 0      | 743/747 (99.46%)      | QNN97377     |
| <i>gp27</i><br>(QSJ04747) | 21882-25844 | + | 3 | 1320 | 143.52 | 8.61  | internal virion<br>protein D    | <i>Enterobacter</i> phage<br>E-3         | 0      | 1306/1320<br>(98.94%) | YP_009198337 |
| <i>gp28</i><br>(QSJ04748) | 25892-27622 | + | 2 | 576  | 63.15  | 5.22  | tail fiber protein              | <i>Klebsiella</i> phage<br>vB_KpnP_Emp27 | 0      | 537/569 (94.38%)      | QEG11854     |
| <i>gp29</i><br>(QSJ04749) | 27586-28050 | + | 1 | 154  | 17.86  | 4.51  | ssDNA binding<br>protein        | <i>Klebsiella</i> phage<br>vB_KpnP_Emp27 | 2e-75  | 110/137 (80.29%)      | QEG11855     |
| <i>gp30</i><br>(QSJ04750) | 28091-28294 | + | 2 | 67   | 7.41   | 6.72  | holin class II                  | <i>Klebsiella</i> phage<br>vB_KpnP_Emp27 | 3e-40  | 67/67 (100%)          | QEG11856     |
| <i>gp31</i><br>(QSJ04751) | 28298-28564 | + | 2 | 88   | 9.91   | 4.46  | DNA packaging<br>protein A      | <i>Klebsiella</i> phage<br>Patroon       | 2e-56  | 88/88 (100%)          | QBQ72912     |

|                           |             |   |   |     |       |       |                                       |                                       |        |                  |              |
|---------------------------|-------------|---|---|-----|-------|-------|---------------------------------------|---------------------------------------|--------|------------------|--------------|
| <i>gp32</i><br>(QSJ04752) | 28642-29106 | + | 1 | 154 | 17.29 | 9.98  | endopeptidase (Rz-like lysis protein) | <i>Citrobacter</i> phage SH1          | 3e-110 | 154/154 (100%)   | YP_009286673 |
| <i>gp33</i><br>(QSJ04753) | 29081-30844 | + | 2 | 587 | 66.72 | 5.17  | DNA packaging protein B               | <i>Klebsiella</i> phage vB_KpnP_Emp27 | 0      | 587/587 (100%)   | QEG11859     |
| <i>gp34</i><br>(QSJ04754) | 32419-32877 | + | 1 | 152 | 17.01 | 7.86  | S-adenosyl-L-methionine hydrolase     | <i>Klebsiella</i> phage Patroon       | 4e-111 | 152/152 (100%)   | QBQ72866     |
| <i>gp35</i><br>(QSJ04755) | 32687-32884 | + | 2 | 65  | 7.36  | 10.71 | hypothetical protein                  | -                                     | -      | -                | -            |
| <i>gp36</i><br>(QSJ04756) | 32941-33099 | + | 1 | 52  | 6.01  | 9.23  | hypothetical protein                  | <i>Citrobacter</i> phage SH2          | 8e-26  | 49/52 (94.23%)   | YP_009289297 |
| <i>gp37</i><br>(QSJ04757) | 33465-34574 | + | 3 | 369 | 42.53 | 8.55  | protein kinase                        | <i>Klebsiella</i> phage NL_ZS_3       | 0      | 325/369 (88.08%) | QNN97343     |
| <i>gp38</i><br>(QSJ04758) | 34645-37299 | + | 1 | 884 | 98.81 | 7.51  | RNA polymerase                        | <i>Klebsiella</i> phage 31            | 0      | 881/884 (99.66%) | QGH73719     |
| <i>gp39</i><br>(QSJ04759) | 37386-37658 | + | 3 | 90  | 10.34 | 9.89  | hypothetical protein                  | <i>Enterobacter</i> phage E-2         | 8e-59  | 89/90 (98.89%)   | YP_009226208 |
| <i>gp40</i><br>(QSJ04760) | 37891-38166 | + | 1 | 91  | 10.48 | 8.50  | dGTP triphosphohydrolase inhibitor    | <i>Klebsiella</i> phage 31            | 3e-60  | 89/91 (97.80%)   | QGH73722     |

**Table S3.** KPP-5 phage gene products are involved in five different modules.

| <b>Modules</b>                                                 | <b>Protein</b>                     | <b>ORFs</b> | <b>Location</b> |
|----------------------------------------------------------------|------------------------------------|-------------|-----------------|
| <b>Replication, regulation, transcription, and translation</b> | DNA ligase                         | ORF 01      | 16-1062         |
|                                                                | Host RNA polymerase inhibitor      | ORF 05      | 2080-2316       |
|                                                                | Endonuclease                       | ORF 06      | 3066-3527       |
|                                                                | DNA primase/helicase               | ORF 08      | 4154-5854       |
|                                                                | DNA polymerase                     | ORF 11      | 6528-8642       |
|                                                                | HNS binding protein                | ORF 12      | 8662-8961       |
|                                                                | HNS binding protein                | ORF 13      | 8961-9170       |
|                                                                | host recBCD nuclease inhibitor     | ORF 14      | 9167-9346       |
|                                                                | Exonuclease                        | ORF 15      | 9343-10254      |
|                                                                | ssDNA binding protein              | ORF 29      | 27586-28050     |
|                                                                | S-adenosyl-L-methionine hydrolase  | ORF 34      | 32419-32877     |
|                                                                | Protein kinase                     | ORF 37      | 33465-34574     |
|                                                                | RNA polymerase                     | ORF 38      | 34645-37299     |
| <b>Host cell lysis</b>                                         | dGTP triphosphohydrolase inhibitor | ORF 40      | 37891-38166     |
|                                                                | Endolysin                          | ORF 07      | 3520-3975       |
|                                                                | Holin class II                     | ORF 30      | 28091-28294     |
| <b>Phage structure</b>                                         | Endopeptidase                      | ORF 32      | 28642-29106     |
|                                                                | Tail assembly protein              | ORF 17      | 10970-11290     |
|                                                                | Head-to-tail joining protein       | ORF 18      | 11301-12908     |
|                                                                | Capsid assembly protein            | ORF 19      | 13010-13942     |
|                                                                | Major capsid protein               | ORF 20      | 14099-15142     |
|                                                                | Major tail protein                 | ORF 21      | 15181-15414     |
|                                                                | Tail tubular protein A             | ORF 22      | 15527-16117     |
|                                                                | Tail tubular protein B             | ORF 23      | 16133-18538     |
|                                                                | Internal virion protein A          | ORF 24      | 18611-19021     |
|                                                                | Internal virion protein B          | ORF 25      | 19024-19617     |
|                                                                | Internal virion protein C          | ORF 26      | 19620-21863     |
|                                                                | Internal virion protein D          | ORF 27      | 21882-25844     |
|                                                                | Tail fiber protein                 | ORF 28      | 25892-27622     |
| <b>DNA packaging</b>                                           | DNA packaging protein A            | ORF 31      | 28298-28564     |
|                                                                | DNA packaging protein B            | ORF 33      | 29081-30844     |
| <b>Unknown functions</b>                                       | hypothetical protein               | ORF 02      | 950-1126        |
|                                                                | hypothetical protein               | ORF 03      | 1232-1489       |
|                                                                | DUF3310 domain-containing protein  | ORF 04      | 1489-1959       |
|                                                                | hypothetical protein               | ORF 09      | 5574-5903       |
|                                                                | hypothetical protein               | ORF 10      | 6176-6460       |
|                                                                | hypothetical protein               | ORF 16      | 10442-10687     |
|                                                                | hypothetical protein               | ORF 35      | 32687-32884     |
|                                                                | hypothetical protein               | ORF 36      | 32941-33099     |
| hypothetical protein                                           | ORF 39                             | 37386-37658 |                 |

**Table S4.** Comparison of phages with BLASTN scores against the KPP-5 phage genome.

| Phage name                            | Host                           | Phage Family             | Genus              | Location | Collection date | Genome Length (kb) | Accession No. | Query Coverage | E-value | Genome Identity      |
|---------------------------------------|--------------------------------|--------------------------|--------------------|----------|-----------------|--------------------|---------------|----------------|---------|----------------------|
| <i>Klebsiella</i> phage vB_KpnP_Emp27 | <i>Klebsiella pneumoniae</i>   | <i>Autographiviridae</i> | <i>Teetrevirus</i> | USA      | 2017            | 38,603             | MN013074      | 99%            | 0       | 16665/17507 (95.19%) |
| <i>Klebsiella</i> phage Patroon       | <i>Klebsiella pneumoniae</i>   | <i>Autographiviridae</i> | <i>Teetrevirus</i> | USA      | 2016            | 39,442             | MK608335      | 95%            | 0       | 22172/23377 (94.85%) |
| <i>Yersinia</i> phage phiYe-F10       | <i>Yersinia enterocolitica</i> | <i>Autographiviridae</i> | <i>Teetrevirus</i> | China    | 2012            | 39,210             | NC_047755     | 94%            | 0       | 23744/24777 (95.83%) |
| <i>Enterobacter</i> phage E-4         | <i>Enterobacter cloacae</i>    | <i>Autographiviridae</i> | <i>Teetrevirus</i> | Portugal | 2014            | 39,142             | KP791807      | 94%            | 0       | 13978/14751 (94.76%) |
| <i>Klebsiella</i> phage NL_ZS_3       | <i>Klebsiella pneumoniae</i>   | <i>Autographiviridae</i> | <i>Teetrevirus</i> | -        | -               | 38,741             | MT813142      | 94%            | 0       | 12490/12955 (96.41%) |
| <i>Citrobacter</i> phage SH2          | <i>Citrobacter freundii</i>    | <i>Autographiviridae</i> | <i>Teetrevirus</i> | -        | -               | 39,158             | NC_031092     | 93%            | 0       | 15703/17435 (90.07%) |
| <i>Escherichia</i> phage LL2          | <i>Escherichia coli</i>        | <i>Autographiviridae</i> | <i>Teetrevirus</i> | USA      | -               | 39,382             | NC_048063     | 93%            | 0       | 10890/11340 (96.03%) |
| <i>Serratia</i> phage SALSA           | <i>Serratia marcescens</i>     | <i>Autographiviridae</i> | <i>Teetrevirus</i> | Germany  | 2018            | 39,933             | MT419366      | 93%            | 0       | 10726/11340 (94.59%) |
| <i>Yersinia</i> phage vB_YenP_AP5     | <i>Yersinia enterocolitica</i> | <i>Autographiviridae</i> | <i>Teetrevirus</i> | Canada   | -               | 38,646             | NC_025451     | 93%            | 0       | 8263/8721 (94.75%)   |
| <i>Klebsiella</i> phage 31            | <i>Klebsiella pneumoniae</i>   | <i>Autographiviridae</i> | <i>Teetrevirus</i> | China    | -               | 39,600             | MN149904      | 93%            | 0       | 9419/10986 (85.74%)  |
| <i>Yersinia</i> phage phiYeO3-12      | <i>Yersinia enterocolitica</i> | <i>Autographiviridae</i> | <i>Teetrevirus</i> | -        | -               | 39,600             | NC_001271     | 93%            | 0       | 7168/7485 (95.76%)   |

|                                      |                                     |                          |                       |                |      |        |           |     |   |                         |
|--------------------------------------|-------------------------------------|--------------------------|-----------------------|----------------|------|--------|-----------|-----|---|-------------------------|
| Leclercia phage<br>10164-302         | <i>Leclercia<br/>adecarboxylata</i> | <i>Autographiviridae</i> | <i>Teetrevirus</i>    | -              | -    | 39,300 | NC_047843 | 92% | 0 | 10895/11338<br>(96.09%) |
| <i>Citrobacter</i> phage<br>SH1      | <i>Citrobacter<br/>freundii</i>     | <i>Autographiviridae</i> | <i>Teetrevirus</i>    | -              | -    | 39,434 | NC_031066 | 92% | 0 | 10463/10886<br>(96.11%) |
| <i>Salmonella</i> phage<br>phiSG-JL2 | <i>Salmonella<br/>enterica</i>      | <i>Autographiviridae</i> | <i>Teetrevirus</i>    | South<br>Korea | -    | 38,815 | NC_010807 | 92% | 0 | 10461/10886<br>(96.10%) |
| <i>Serratia</i> phage<br>SM9-3Y      | <i>Serratia<br/>marcescens</i>      | <i>Autographiviridae</i> | <i>Teetrevirus</i>    | -              | -    | 39,631 | NC_047774 | 91% | 0 | 10555/10992<br>(96.02%) |
| <i>Citrobacter</i> phage<br>phiCFP-1 | <i>Citrobacter<br/>freundii</i>     | <i>Autographiviridae</i> | <i>Teetrevirus</i>    | China          | 2013 | 38,625 | NC_028880 | 90% | 0 | 12489/12988<br>(96.16%) |
| <i>Enterobacter</i><br>phage E-2     | <i>Enterobacter<br/>cloacae</i>     | <i>Autographiviridae</i> | <i>Teetrevirus</i>    | Portugal       | 2014 | 36,051 | NC_029102 | 89% | 0 | 13978/14751<br>(94.76%) |
| <i>Enterobacter</i><br>phage E-3     | <i>Enterobacter<br/>cloacae</i>     | <i>Autographiviridae</i> | <i>Teetrevirus</i>    | Portugal       | 2014 | 31,522 | NC_028795 | 79% | 0 | 14035/14572<br>(96.31%) |
| <i>Salmonella</i> phage<br>C2        | <i>Salmonella<br/>enterica</i>      | <i>Autographiviridae</i> | <i>Teseptimavirus</i> | South<br>Korea | 2016 | 38,554 | MN026740  | 79% | 0 | 7543/11026<br>(68.41%)  |
| <i>Escherichia</i> phage<br>N30      | <i>Escherichia coli</i>             | <i>Autographiviridae</i> | <i>Teseptimavirus</i> | China          | -    | 39,266 | NC_048078 | 78% | 0 | 5183/7599<br>(68.21%)   |
| <i>Serratia</i> phage<br>Pila        | <i>Serratia<br/>marcescens</i>      | <i>Autographiviridae</i> | <i>Teseptimavirus</i> | USA            | 2018 | 38,678 | MN098329  | 78% | 0 | 6588/9633<br>(68.39%)   |
| <i>Escherichia</i> phage<br>EG1      | <i>Escherichia coli</i>             | <i>Autographiviridae</i> | <i>Teseptimavirus</i> | China          | 2016 | 39,919 | NC_047895 | 78% | 0 | 5257/7648<br>(68.74%)   |
| <i>Escherichia</i> phage<br>T7       | <i>Escherichia coli</i>             | <i>Autographiviridae</i> | <i>Teseptimavirus</i> | -              | -    | 39,938 | AY264774  | 78% | 0 | 5192/7603<br>(68.29%)   |
| <i>Escherichia</i> phage<br>P483     | <i>Escherichia coli</i>             | <i>Autographiviridae</i> | <i>Berlinvirus</i>    | -              | -    | 40,829 | NC_028822 | 71% | 0 | 2926/4006<br>(73.04%)   |

|                                        |                              |                          |                     |        |      |        |           |        |   |                       |
|----------------------------------------|------------------------------|--------------------------|---------------------|--------|------|--------|-----------|--------|---|-----------------------|
| <i>Salmonella</i> phage BSP161         | <i>Salmonella enterica</i>   | <i>Autographiviridae</i> | <i>Berlinvirus</i>  | -      | -    | 39,688 | NC_048105 | 71%    | 0 | 3060/4241<br>(72.15%) |
| <i>Shigella</i> phage VB_Ship_A7       | <i>Shigella flexneri</i>     | <i>Autographiviridae</i> | <i>Berlinvirus</i>  | China  | -    | 40,058 | NC_048180 | 71%    | 0 | 2892/3974<br>(72.77%) |
| <i>Escherichia</i> phage PhiV-1        | <i>Escherichia coli</i>      | <i>Autographiviridae</i> | <i>Berlinvirus</i>  | -      | 2019 | 39461  | MT542512  | 71%    | 0 | 2884/3964<br>(72.75%) |
| <i>Salmonella</i> phage BP12A          | <i>Salmonella enterica</i>   | <i>Autographiviridae</i> | <i>Berlinvirus</i>  | Canada | 2003 | 39,696 | KM366096  | 71%    |   | 2899/3988<br>(72.69%) |
| <i>Klebsiella</i> phage Henu1          | <i>Klebsiella pneumoniae</i> | <i>Autographiviridae</i> | <i>Przondovirus</i> | China  | 2017 | 40,352 | NC_048138 | 69%    | 0 | 4619/6644<br>(69.52%) |
| <i>Klebsiella</i> phage KN1-1          | <i>Klebsiella pneumoniae</i> | <i>Autographiviridae</i> | <i>Przondovirus</i> | Taiwan | -    | 40,236 | NC_048129 | 69%    | 0 | 4523/6482<br>(69.78%) |
| <i>Klebsiella</i> phage vB_KpnP_IME335 | <i>Klebsiella pneumoniae</i> | <i>Autographiviridae</i> | <i>Przondovirus</i> | China  | -    | 40,361 | MN176574  | 69%    | 0 | 4412/6303<br>(70.00%) |
| <i>Klebsiella</i> phage Kund-ULIP54    | <i>Klebsiella pneumoniae</i> | <i>Autographiviridae</i> | <i>Przondovirus</i> | France | 2015 | 41,109 | MK380016  | 69%    | 0 | 3994/5641<br>(70.80%) |
| <i>Klebsiella</i> phage vB_KpnP_IL33   | <i>Klebsiella pneumoniae</i> | <i>Autographiviridae</i> | <i>Przondovirus</i> | Poland | 2014 | 41,335 | NC_047782 | 69%    | 0 | 3995/5643<br>(70.80%) |
| <i>Enterobacteria</i> phage DE3        | <i>Escherichia coli</i>      | <i>Siphoviridae</i>      | <i>Lambdavirus</i>  | -      | -    | 42,925 | NC_042057 | 76.50% | 0 | 2031/2655<br>(6%)     |



**Table S5.** The core genes of *Klebsiella* phage KPP-5, *Klebsiella* phage vB\_KpnP\_Emp27, *Klebsiella* phage Patroon, *Klebsiella* phage NL\_ZS\_3, and *Klebsiella* phage 31.

| <i>Klebsiella</i> phage Kpp-5 |                                        | <i>Klebsiella</i> phage vB_KpnP_Emp27 |                                                                  |                  | <i>Klebsiella</i> phage Patroon                            | <i>Klebsiella</i> phage NL_ZS_3 |                                                             | <i>Klebsiella</i> phage 31 |                                                  |
|-------------------------------|----------------------------------------|---------------------------------------|------------------------------------------------------------------|------------------|------------------------------------------------------------|---------------------------------|-------------------------------------------------------------|----------------------------|--------------------------------------------------|
| Gene accession                | Product                                | Accession Number                      | Product [Identities]                                             | Accession Number | Product [Identities]                                       | Accession Number                | Product [Identities]                                        | Accession Number           | Product [Identities]                             |
| <i>gp1</i><br>(QSJ04721)      | DNA ligase                             | QEG11869                              | putative DNA ligase<br>[345/348(99.14%)]                         | QBQ72877         | ATP-dependent DNA ligase<br>[309/348(88.79%)]              | QNN97348                        | ATP-dependent DNA ligase<br>[324/348(93.10%)]               | QGH73723                   | hypothetical protein<br>[343/348(98.56%)]        |
| <i>gp3</i><br>(QSJ04723)      | hypothetical protein                   | QEG11870                              | hypothetical protein<br>[75/85(88.24%)]                          | QBQ72879         | hypothetical protein<br>[82/85(96.47%)]                    | QNN97349                        | hypothetical protein<br>[76/85(89.41%)]                     | QGH73724                   | hypothetical protein<br>[75/85(88.24%)]          |
| <i>gp4</i><br>(QSJ04724)      | DUF3310 domain-containing protein      | QEG11871                              | DUF3310 domain-containing protein<br>[154/156(98.72%)]           | QBQ72880         | hypothetical protein<br>[129/163(79.14%)]                  | QNN97350                        | nucleotide kinase<br>[154/159(96.86%)]                      | QGH73725                   | hypothetical protein<br>[153/156(98.08%)]        |
| <i>gp5</i><br>(QSJ04725)      | Host RNA polymerase inhibitor, T7-like | QEG11873                              | putative host RNA polymerase inhibitor<br>[77/78(98.72%)]        | QBQ72881         | inhibitor of host bacterial RNA polymerase<br>[49/50(98%)] | QNN97351                        | bacterial RNA polymerase inhibitor<br>[77/78(98.72%)]       | QGH73727                   | host RNA polymerase inhibitor<br>[77/78(98.72%)] |
| <i>gp6</i><br>(QSJ04726)      | endonuclease                           | QEG11875                              | putative endonuclease<br>[152/153(99.35%)]                       | QBQ72884         | endonuclease I<br>[111/141(78.72%)]                        | QNN97353                        | endonuclease I<br>[152/153(99.35%)]                         | -                          | -                                                |
| <i>gp7</i><br>(QSJ04727)      | endolysin                              | QEG11876                              | putative N-acetylmuramoyl-L-alanine amidase<br>[150/151(99.34%)] | QBQ72885         | endolysin<br>[146/151(96.69%)]                             | QNN97354                        | endolysin<br>[144/151(95.36%)]                              | QGH73730                   | lysin [151/151(100%)]                            |
| <i>gp8</i><br>(QSJ04728)      | DNA primase/helicase                   | QEG11877                              | putative primase/helicase<br>[559/566(98.76%)]                   | QBQ72887         | DNA primase/helicase<br>[540/566(95.41%)]                  | QNN97357                        | primase/helicase protein<br>[499/504(99.01%)]               | QGH73732                   | hypothetical protein<br>[498/504(98.81%)]        |
| <i>gp10</i><br>(QSJ04730)     | hypothetical protein                   | QEG11879                              | hypothetical protein<br>[92/94(97.87%)]                          | QBQ72889         | hypothetical protein<br>[93/94(98.94%)]                    | QNN97359                        | inhibitor of host toxin/antitoxin system<br>[92/94(97.87%)] | QGH73734                   | hypothetical protein<br>[94/94(100%)]            |
| <i>gp11</i><br>(QSJ04731)     | DNA polymerase                         | QEG11880                              | putative DNA polymerase<br>[695/704(98.72%)]                     | QBQ72890         | DNA polymerase<br>[699/704(99.29%)]                        | QNN97360                        | DNA-directed DNA polymerase<br>[698/704(99.15%)]            | QGH73735                   | DNA polymerase<br>[698/704(99.15%)]              |

|                           |                                |          |                                                         |          |                                                |          |                                                          |          |                                               |
|---------------------------|--------------------------------|----------|---------------------------------------------------------|----------|------------------------------------------------|----------|----------------------------------------------------------|----------|-----------------------------------------------|
| <i>gp12</i><br>(QSJ04732) | HNS binding protein            | QEG11881 | putative HNS binding protein [88/99(88.89%)]            | QBQ72891 | HNS binding protein [47/101(46.53%)]           | QNN97361 | suppressor of silencing [44/101(43.56%)]                 | QGH73736 | putative HNS binding protein [98/99(98.99%)]  |
| <i>gp13</i><br>(QSJ04733) | HNS binding protein            | QEG11882 | hypothetical protein [69/69(100%)]                      | QBQ72892 | hypothetical protein [68/69(98.55%)]           | QNN97362 | hypothetical protein [66/69(95.65%)]                     | QGH73738 | putative HNS binding protein [67/69(97.10%)]  |
| <i>gp14</i><br>(QSJ04734) | host recBCD nuclease inhibitor | QEG11883 | hypothetical protein [32/49(65.31%)]                    | QBQ72893 | host recBCD nuclease inhibitor [42/59(71.19%)] | QNN97363 | inhibitor of recBCD nuclease [42/59(71.19%)]             | QGH73739 | inhibitor of recBCD nuclease [42/59(71.19%)]  |
| <i>gp15</i><br>(QSJ04735) | exonuclease                    | QEG11884 | putative exonuclease [295/303(97.36%)]                  | QBQ72894 | exonuclease [302/303(99.67%)]                  | QNN97364 | exonuclease [297/303(98.02%)]                            | QGH73740 | exonuclease [297/303(98.02%)]                 |
| <i>gp16</i><br>(QSJ04736) | hypothetical protein           | QEG11886 | hypothetical protein [62/64(96.88%)]                    | QBQ72896 | hypothetical protein [79/81(97.53%)]           | QNN97366 | hypothetical protein [79/81(97.53%)]                     | QGH73741 | hypothetical protein [79/81(97.53%)]          |
| <i>gp17</i><br>(QSJ04739) | tail assembly protein          | QEG11888 | putative tail assembly protein [97/113(85.84%)]         | QBQ72898 | host specificity protein B [105/106(99.06%)]   | QNN97368 | virion assembly protein [101/106(95.28%)]                | QGH73743 | host specificity protein [97/106(91.51%)]     |
| <i>gp18</i><br>(QSJ04737) | head-to-tail joining protein   | QEG11889 | putative head-to-tail joining protein [532/535(99.44%)] | QBQ72899 | head-to-tail joining protein [534/535(99.81%)] | QNN97369 | collar, head-to-tail connector protein [534/535(99.81%)] | QGH73744 | hypothetical protein [532/535(99.44%)]        |
| <i>gp19</i><br>(QSJ04738) | capsid assembly protein        | QEG11890 | putative capsid assembly protein [293/310(94.52%)]      | QBQ72900 | capsid assembly protein [299/310(96.45%)]      | QNN97370 | capsid assembly scaffolding protein [305/310(98.39%)]    | QGH73745 | hypothetical protein [303/310(97.74%)]        |
| <i>gp20</i><br>(QSJ04740) | major capsid protein           | QEG11891 | putative minor capsid protein [335/344(97.38%)]         | QBQ72901 | major capsid protein [342/349(97.99%)]         | QNN97371 | major capsid protein [346/347(99.71%)]                   | QGH73746 | capsid and scaffold protein [334/343(97.38%)] |
| <i>gp21</i><br>(QSJ04741) | major tail protein             | QEG11847 | putative minor capsid protein [37/70(52.86%)]           | -        | -                                              | -        | -                                                        | -        | -                                             |
| <i>gp22</i><br>(QSJ04742) | tail tubular protein A         | QEG11848 | putative tail tubular protein A [193/196(98.47%)]       | QBQ72903 | tail tubular protein A [193/196(98.47%)]       | QNN97373 | non-contractile tail tubular protein [195/196(99.49%)]   | QGH73747 | tail tubular protein A [194/196(98.98%)]      |

|                           |                                       |          |                                                        |          |                                               |          |                                                        |            |                                           |
|---------------------------|---------------------------------------|----------|--------------------------------------------------------|----------|-----------------------------------------------|----------|--------------------------------------------------------|------------|-------------------------------------------|
| <i>gp23</i><br>(QSJ04743) | tail tubular protein B                | QEG11849 | putative tail tubular protein B [781/801(97.50%)]      | QBQ72904 | tail tubular protein B [793/801(98.63%)]      | QNN97374 | non-contractile tail tubular protein [794/801(99.13%)] | QGH73748   | hypothetical protein [795/801(99.25%)]    |
| <i>gp24</i><br>(QSJ04744) | internal virion protein A             | QEG11850 | putative internal virion protein A [133/136(97.06%)]   | QBQ72905 | internal virion protein A [132/136(97.06%)]   | QNN97375 | scaffold protein [131/136(96.32%)]                     | QGH73749   | internal (core) protein [134/136(98.53%)] |
| <i>gp25</i><br>(QSJ04745) | internal virion protein B             | QEG11851 | putative internal virion protein B [191/197(96.95%)]   | QBQ72906 | internal virion protein B [195/197(98.98%)]   | QNN97376 | DNA ejectosome component [193/197(97.97%)]             | QGH73750   | protein inside capsid B [196/197(99.49%)] |
| <i>gp26</i><br>(QSJ04746) | internal virion protein C             | QEG11852 | putative internal virion protein C [734/747(98.26%)]   | QBQ72907 | internal virion protein C [737/747(98.66%)]   | QNN97377 | DNA ejectosome component [743/747(99.46%)]             | QGH73751   | hypothetical protein [596/747(79.79%)]    |
| <i>gp27</i><br>(QSJ04747) | internal virion protein D             | QEG11853 | putative internal virion protein D [1301/1320(98.56%)] | QBQ72908 | internal virion protein D [1297/1320(98.26%)] | QNN97332 | DNA ejectosome component [1282/1320(97.12%)]           | QGH73752   | hypothetical protein [1080/1315(82.13%)]  |
| <i>gp28</i><br>(QSJ04748) | tail fiber protein                    | QEG11854 | putative tail fiber protein [537/569(94.38%)]          | QBQ72909 | tail fiber protein [274/528(51.89%)]          | QNN97333 | non-contractile tail fiber protein [215/305(70.49%)]   | QGH73753   | tail fiber protein [275/530(51.89%)]      |
| <i>gp29</i><br>(QSJ04749) | ssDNA binding protein                 | QEG11855 | putative ssDNA binding protein [110/137(80.29%)]       | QBQ72910 | hypothetical protein [40/107(37.38%)]         | QNN97334 | hypothetical protein [46/105(43.81%)]                  | QGH73754   | hypothetical protein [41/107(38.32%)]     |
| <i>gp30</i><br>(QSJ04750) | holin class II                        | QEG11856 | putative class II holin [67/67(100%)]                  | QBQ72911 | holin [60/67(89.55%)]                         | QNN97335 | class II holin [67/67(100%)]                           | QGH73755   | class II holin [67/67(100%)]              |
| <i>gp31</i><br>(QSJ04751) | DNA packaging protein A               | QEG11857 | putative DNA packaging protein [87/88(98.86%)]         | QBQ72912 | DNA packaging protein A [88/88(100%)]         | QNN97336 | terminase small subunit [87/88(98.86%)]                | QGH73756   | DNA packaging protein A [88/88(100%)]     |
| <i>gp32</i><br>(QSJ04752) | endopeptidase (Rz-like lysis protein) | QEG11858 | putative endopeptidase [132/132(100%)]                 | QBQ72913 | I-spanin [149/150(99.33%)]                    | QNN97337 | endopeptidase Rz [150/150(100%)]                       | QGH73757   | endopeptidase Rz [86/148(58.11%)]         |
| <i>gp33</i><br>(QSJ04753) | DNA packaging protein B               | QEG11859 | putative DNA packaging protein [587/587(100%)]         | QBQ72915 | DNA packaging protein B [582/587(99.15%)]     | QNN97338 | terminase large subunit [587/587(100%)]                | QGH73759.1 | DNA packaging protein [578/587(98.47%)]   |
| <i>gp34</i><br>(QSJ04754) | S-adenosyl-L-methionine hydrolase     | QEG11860 | putative adenosyl-L-methionine                         | QBQ72866 | S-adenosyl-L-methionine                       | QNN97340 | S-adenosyl-L-methionine                                | QGH73714   | S-adenosyl-L-methionine                   |

|                           |                                          |          |                                                                       |          |                                                                   |          |                                                     |          |                                                             |
|---------------------------|------------------------------------------|----------|-----------------------------------------------------------------------|----------|-------------------------------------------------------------------|----------|-----------------------------------------------------|----------|-------------------------------------------------------------|
|                           |                                          |          | hydrolase<br>[145/152(95.39%)]                                        |          | hydrolase<br>[152/152(100%)]                                      |          | hydrolase<br>[151/152(99.34%)]                      |          | hydrolase<br>[139/152(91.45%)]                              |
| <i>gp36</i><br>(QSJ04756) | hypothetical protein                     | QEG11861 | hypothetical protein<br>[47/52(90.38%)]                               | QBQ72868 | hypothetical protein<br>[48/52(92.31%)]                           | QNN97341 | hypothetical<br>protein<br>[45/52(86.54%)]          | -        | -                                                           |
| <i>gp37</i><br>(QSJ04757) | protein kinase                           | QEG11864 | putative protein<br>kinase<br>[313/370(84.59%)]                       | QBQ72871 | protein kinase<br>[314/370(84.86%)]                               | QNN97343 | serine/threonine<br>kinase<br>[325/369(88.08%)]     | QGH73718 | hypothetical protein<br>[297/370(80.27%)]                   |
| <i>gp38</i><br>(QSJ04758) | RNA polymerase                           | QEG11865 | putative RNA<br>polymerase<br>[879/884(99.43%)]                       | QBQ72872 | RNA polymerase<br>[875/884(98.98%)]                               | QNN97344 | DNA-directed RNA<br>polymerase<br>[879/884(99.43%)] | QGH73719 | DNA-directed RNA<br>polymerase<br>[881/884(99.66%)]         |
| <i>gp39</i><br>(QSJ04759) | hypothetical protein                     | QEG11866 | hypothetical protein<br>[87/90(96.67%)]                               | QBQ72873 | hypothetical protein<br>[86/90(95.56%)]                           | QNN97345 | hypothetical<br>protein<br>[28/74(37.84%)]          | QGH73720 | hypothetical protein<br>[87/90(96.67%)]                     |
| <i>gp40</i><br>(QSJ04760) | dGTP<br>triphosphohydrolase<br>inhibitor | QEG11868 | putative dGTP<br>triphosphohydrolas<br>e inhibitor<br>[87/91(95.60%)] | QBQ72875 | host dGTP<br>triphosphohydrolas<br>e inhibitor<br>[86/90(95.56%)] | QNN97347 | hypothetical<br>protein<br>[89/91(97.80%)]          | QGH73722 | dGTP<br>triphosphohydrolase<br>inhibitor<br>[89/91(97.80%)] |
